# Supplementary material for: Exosomal miR-126 as a circulating biomarker in non-small-cell lung cancer regulating cancer progression
Source: PubMed Central journal article supplement (PMC5681649; doi:10.1038/s41598-017-15475-6), 2017-11-10
Supplement: 41598_2017_15475_MOESM1_ESM.pdf [file 41598_2017_15475_MOESM1_ESM.pdf]

# Exosomal miR-126 as a circulating biomarker in non-small-cell lung cancer regulating cancer progression

Franco Grimolizzi<sup>1</sup>°, Federica Monaco<sup>2</sup>°, Francesca Leoni<sup>1</sup>, Massimo Bracci<sup>2</sup>, Sara Staffolani<sup>2</sup>,  
Cristiana Bersaglieri<sup>2</sup>, Simona Gaetani<sup>2</sup>, Matteo Valentino<sup>2</sup>, Monica Amati<sup>2</sup>, Corrado Rubini<sup>3</sup>,  
Franca Saccucci<sup>1</sup>, Jiri Neuzil<sup>4,5</sup>, Marco Tomasetti<sup>2\*</sup>, Lory Santarelli<sup>2\*</sup>

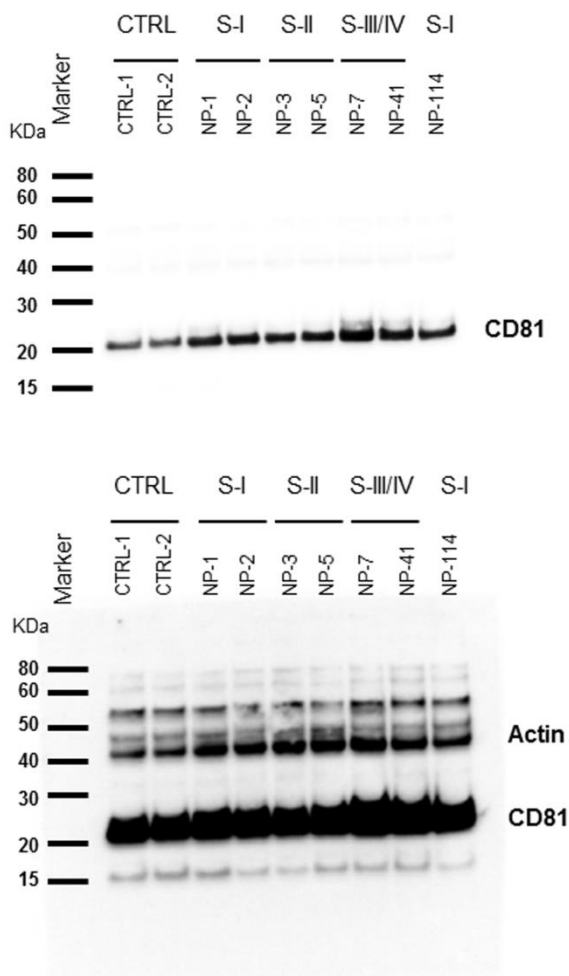

Supplementary information. Original CD81 immunoblot of isolated exosomes from controls (CTRL-1, CTRL-2) and patients affected by NSCLC at early stages, Stage-I (NP-1, NP-2, NP-114), Stage-II (NP-3, NP-5) and advanced stages, Stage III/IV (NP-7, NP-41). For immunoblotting, exosomes (10  $\mu$ g protein) were resolved using 4-12% SDS-PAGE (Life Technologies), transferred to nitrocellulose membranes, and incubated overnight with anti-CD81 (generously provided by Prof. Fabio Malavasi, University of Torino, Torino, Italy). Actin (Bethyl) was used as loading control. After incubation with an HRP-conjugated secondary IgG (Sigma), the blots were developed using the ECL detection system (Pierce Biotechnology). Intensities of the individual bands were visualized by ChemiDoc using the Quantity One software (BioRad).
